# Supplementary material for: Nitrogen–boron coordination versus OH⋯N hydrogen bonding in pyridoxaboroles – aza analogues of benzoxaboroles
Source: Royal Society of Chemistry journal article supplement (doi:10.1039/c5dt02402a), 2015-01-01
Supplement: c5dt02402a1.pdf [file c5dt02402a1.pdf]

## Supporting Information

for

### **Nitrogen-boron coordination versus OH...N hydrogen bonding in pyridoxaboroles – aza analogues of benzoxaboroles**

I. Steciuk,<sup>a</sup> K. Durka,<sup>a</sup> K. Gontarczyk,<sup>a</sup> M. Dąbrowski,<sup>a</sup> S. Luliński\*<sup>a</sup> and K. Woźniak<sup>b</sup>

*<sup>a</sup>Warsaw University of Technology, Faculty of Chemistry, Physical Chemistry Department,  
Noakowskiego 3, 00-664 Warsaw, Poland*

*<sup>b</sup>University of Warsaw, Department of Chemistry, Pasteura 1, 02-093 Warsaw, Poland*

### **Table of Contents**

|                                                   |    |
|---------------------------------------------------|----|
| 1. NMR spectra of new compounds .....             | 2  |
| 2. The p <i>K</i> <sub>a</sub> measurements ..... | 11 |
| 3. Thermal analysis.....                          | 15 |

## 1. NMR spectra of new compounds

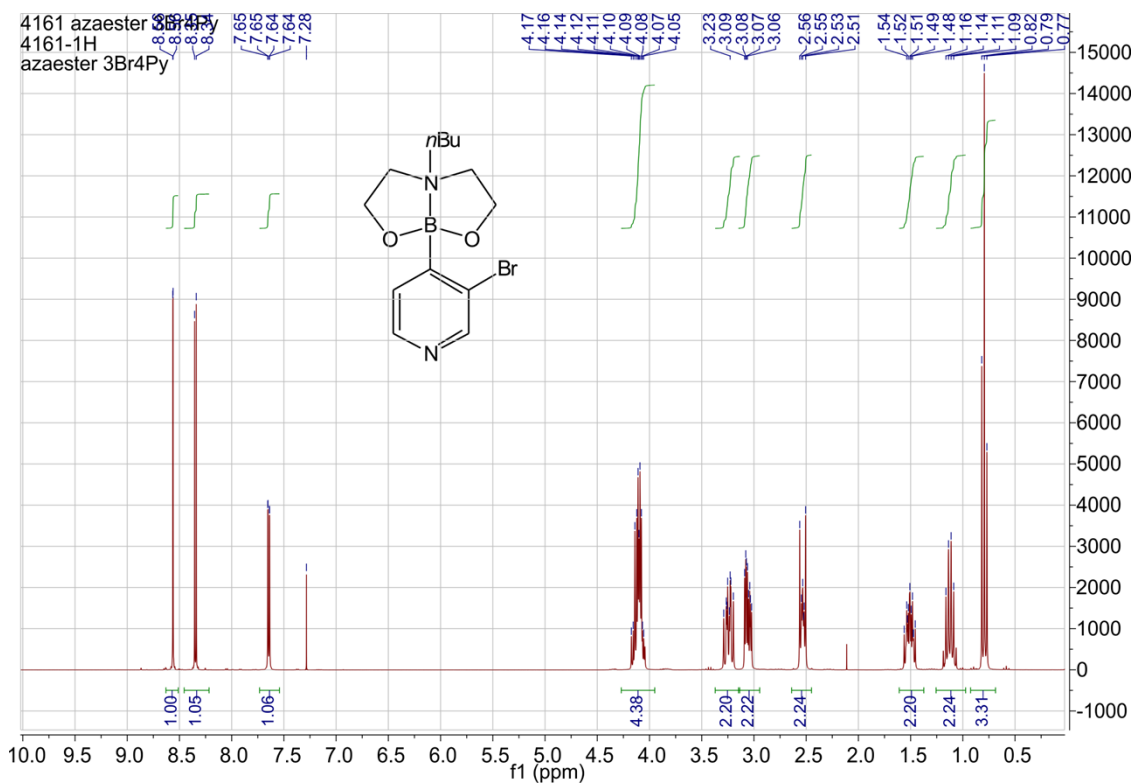

**Figure S1.**  $^1\text{H}$  NMR spectrum of compound **2** (400 MHz,  $\text{CDCl}_3$  solution).

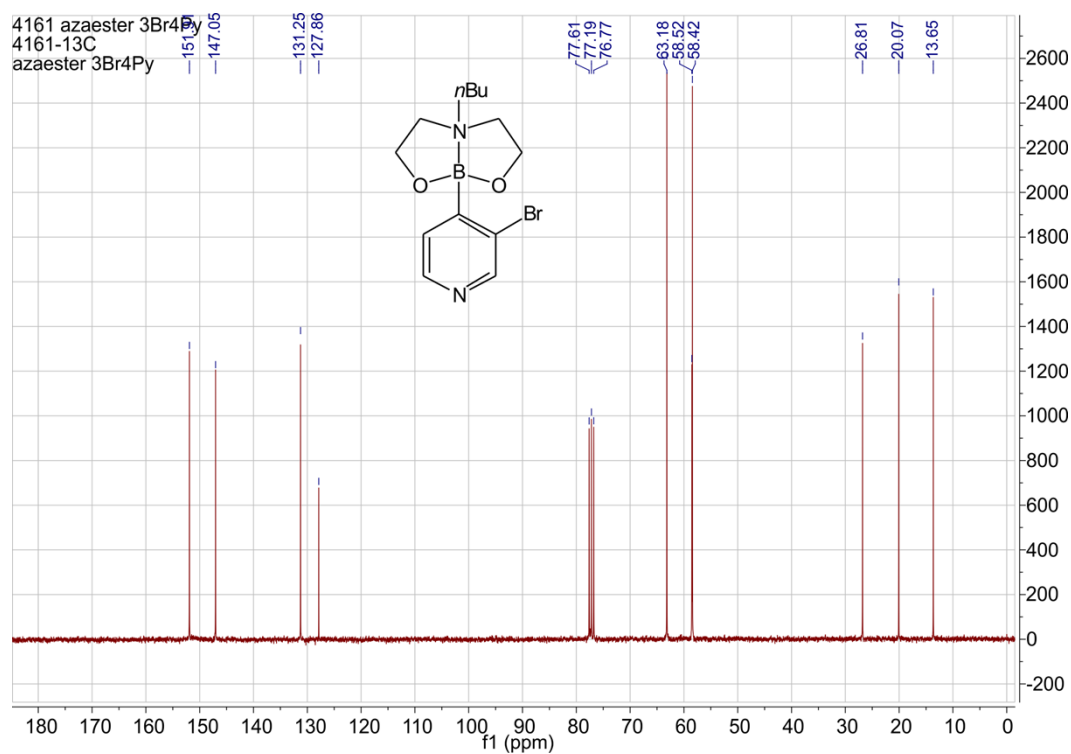

**Figure S2.**  $^{13}\text{C}$  NMR spectrum of compound **2** (100.6 MHz,  $\text{CDCl}_3$  solution).

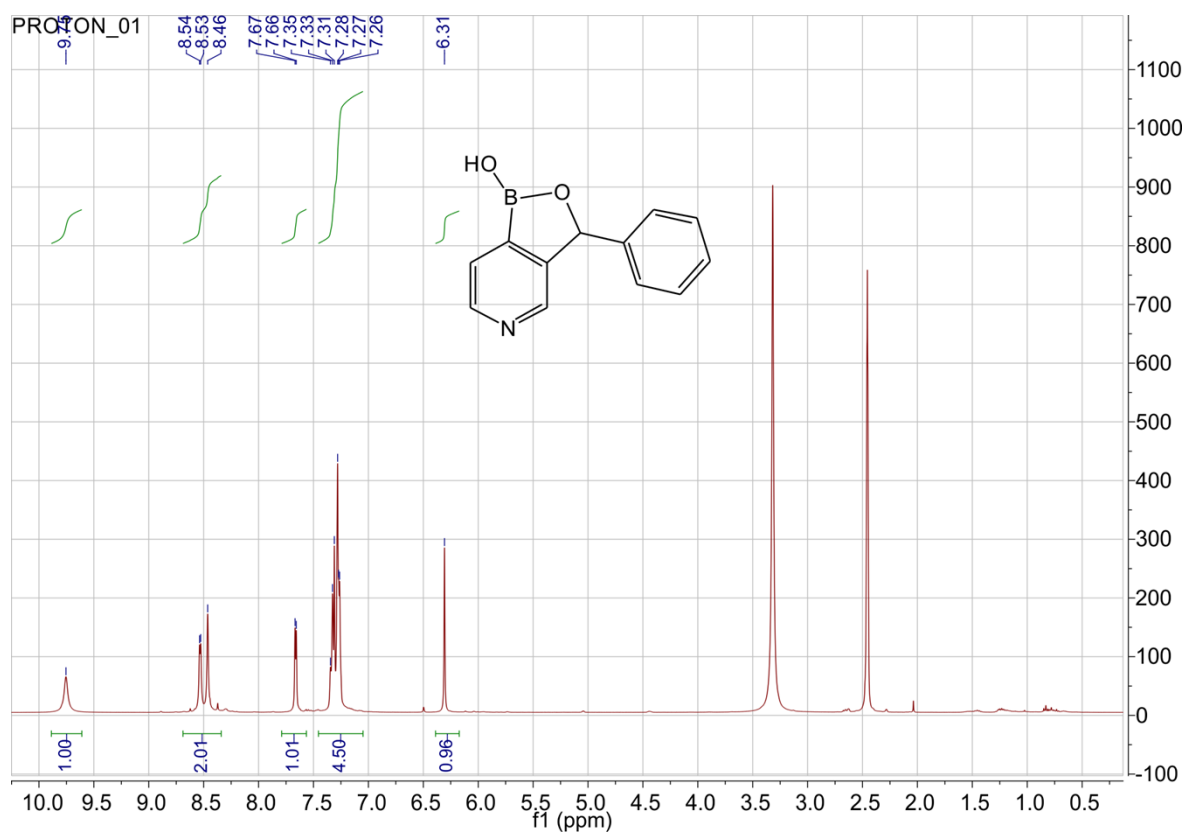

**Figure S3.**  $^1\text{H}$  NMR spectrum of compound **3a** (400 MHz,  $\text{DMSO}-d_6$  solution).

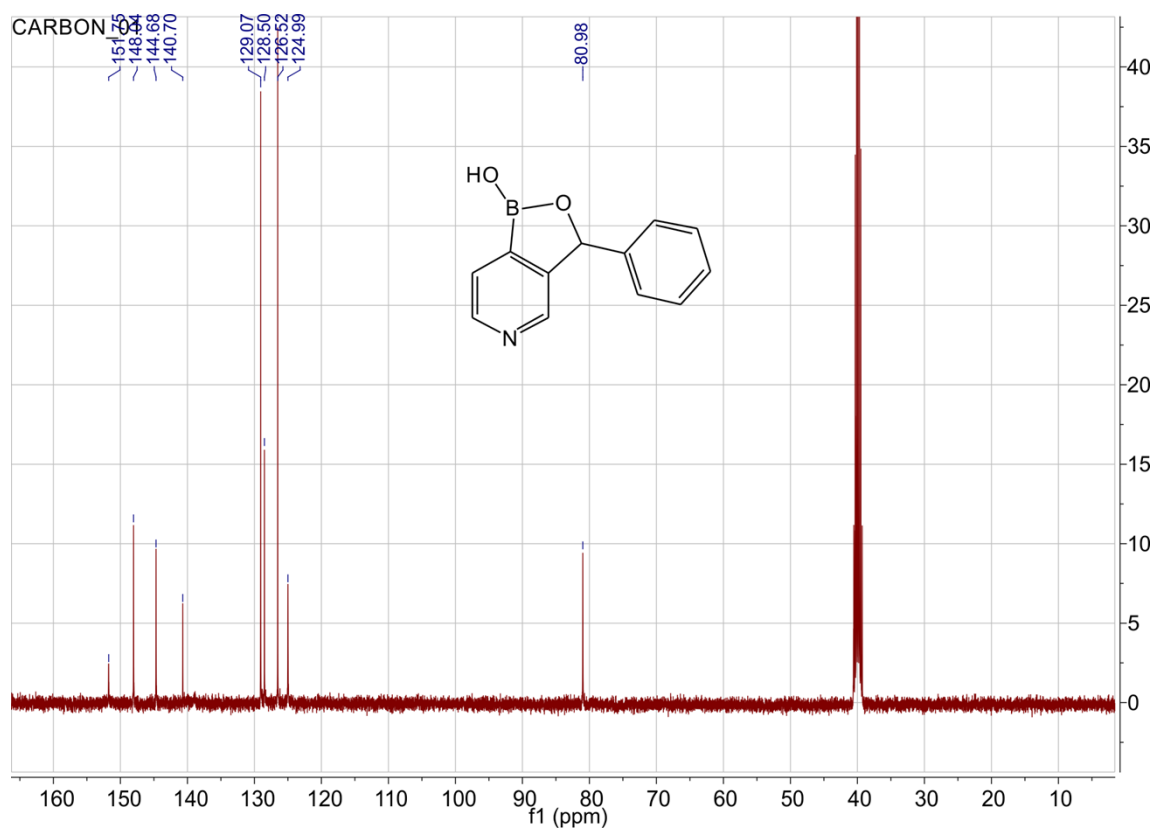

**Figure S4.**  $^{13}\text{C}$  NMR spectrum of compound **3a** (100.6 MHz,  $\text{DMSO}-d_6$  solution).

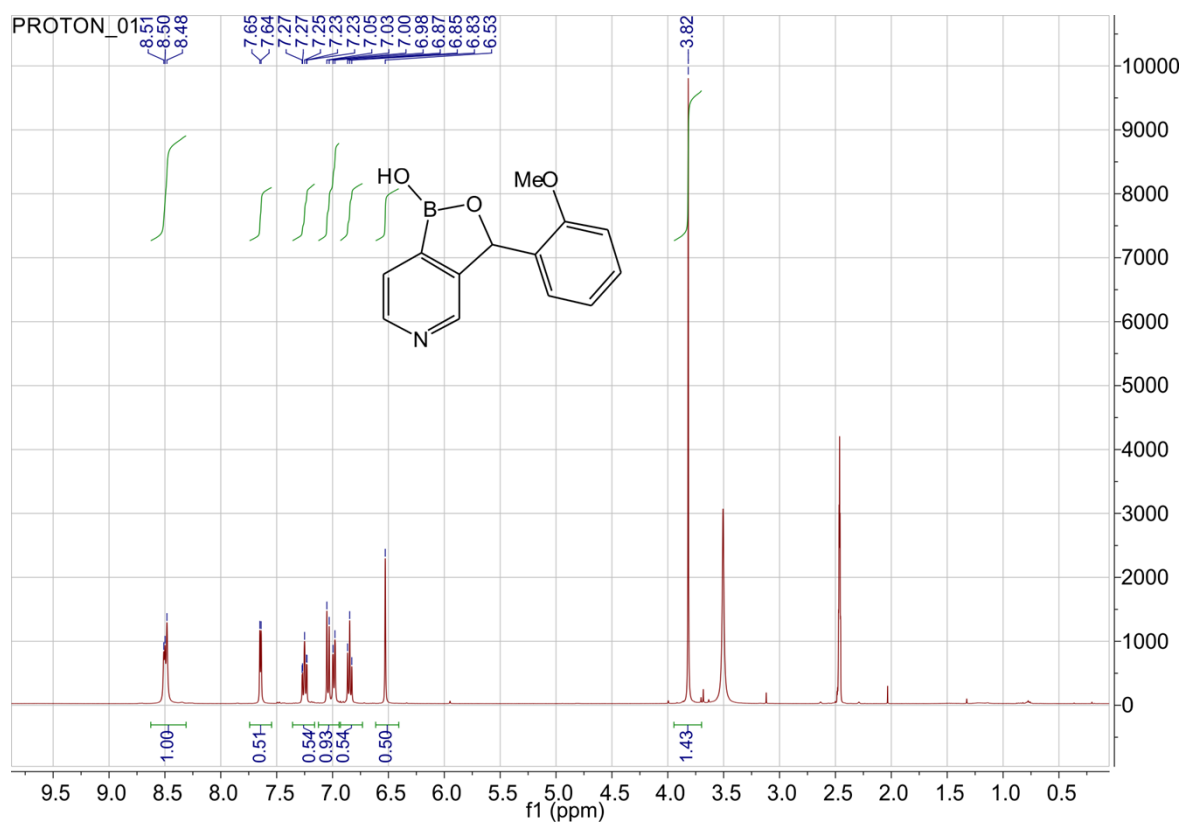

**Figure S5.**  $^1\text{H}$  NMR spectrum of compound **3b** (400 MHz,  $\text{DMSO-}d_6$  solution).

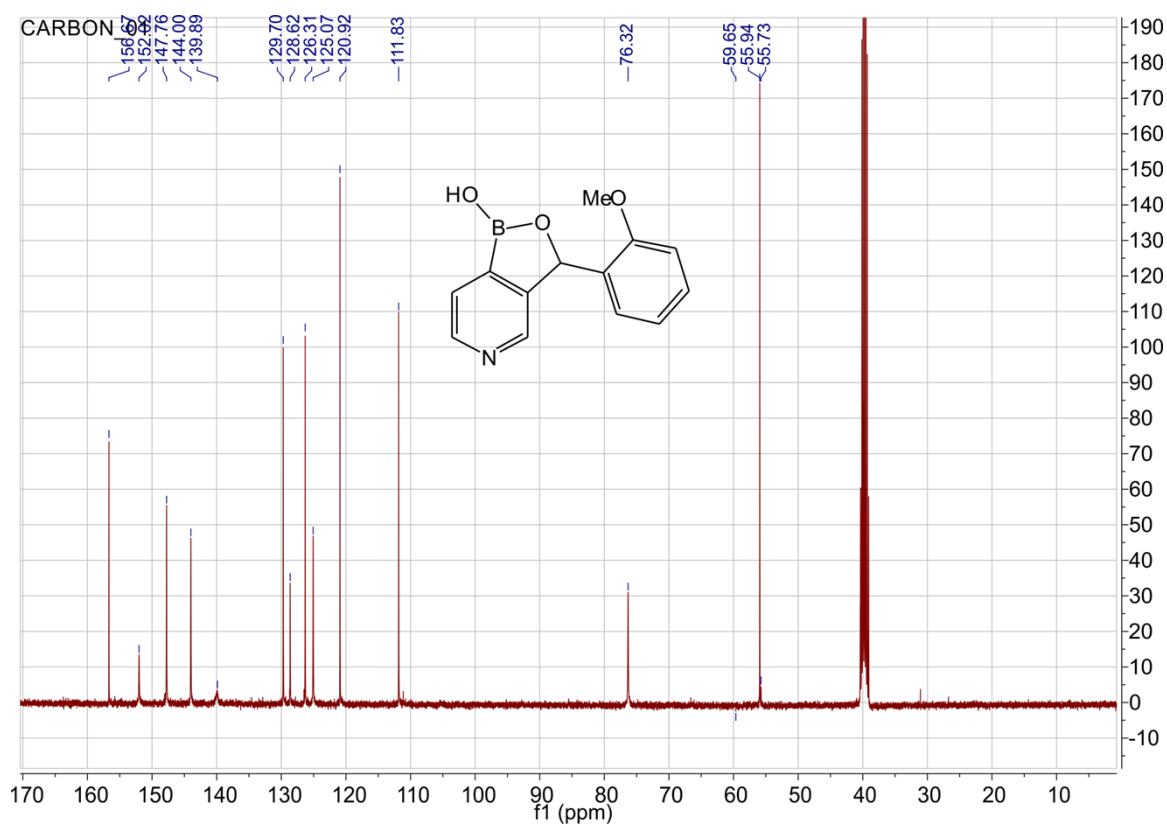

**Figure S6.**  $^{13}\text{C}$  NMR spectrum of compound **3b** (100.6 MHz,  $\text{DMSO-}d_6$  solution).

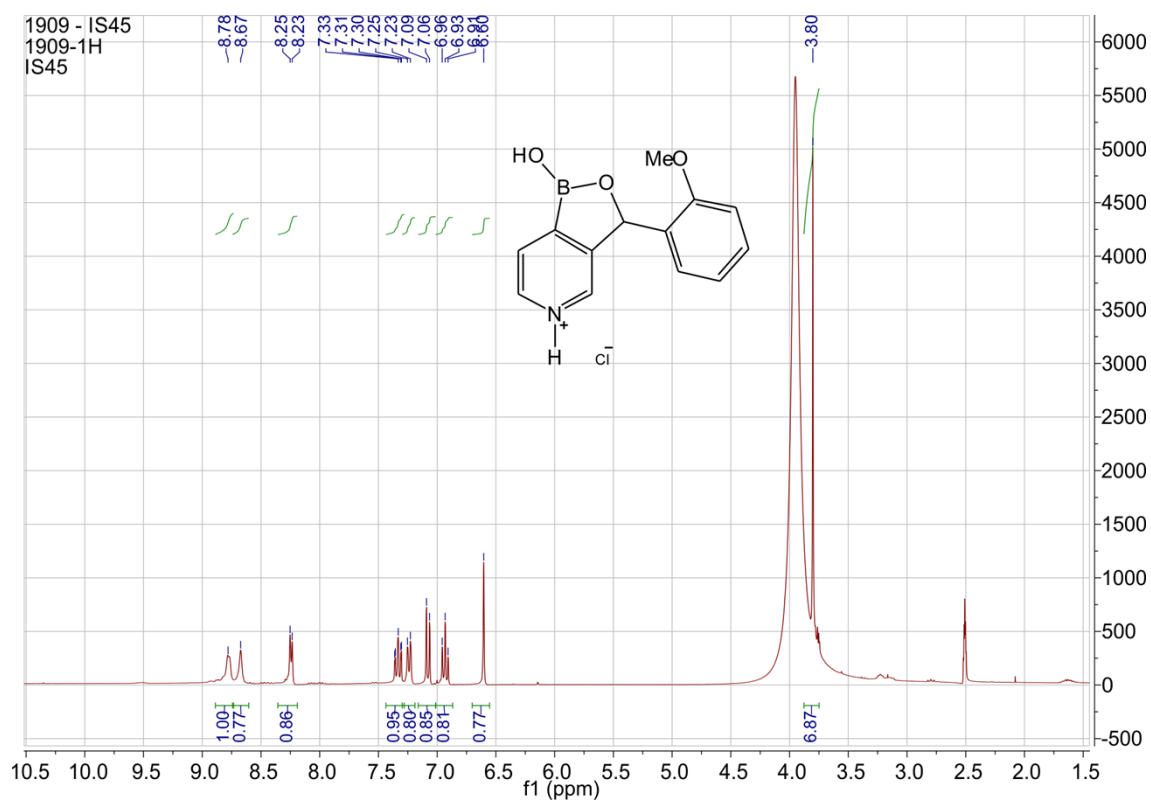

**Figure S7.**  $^1\text{H}$  NMR spectrum of compound **[3b-H]Cl** (300 MHz,  $\text{DMSO-}d_6$  solution).

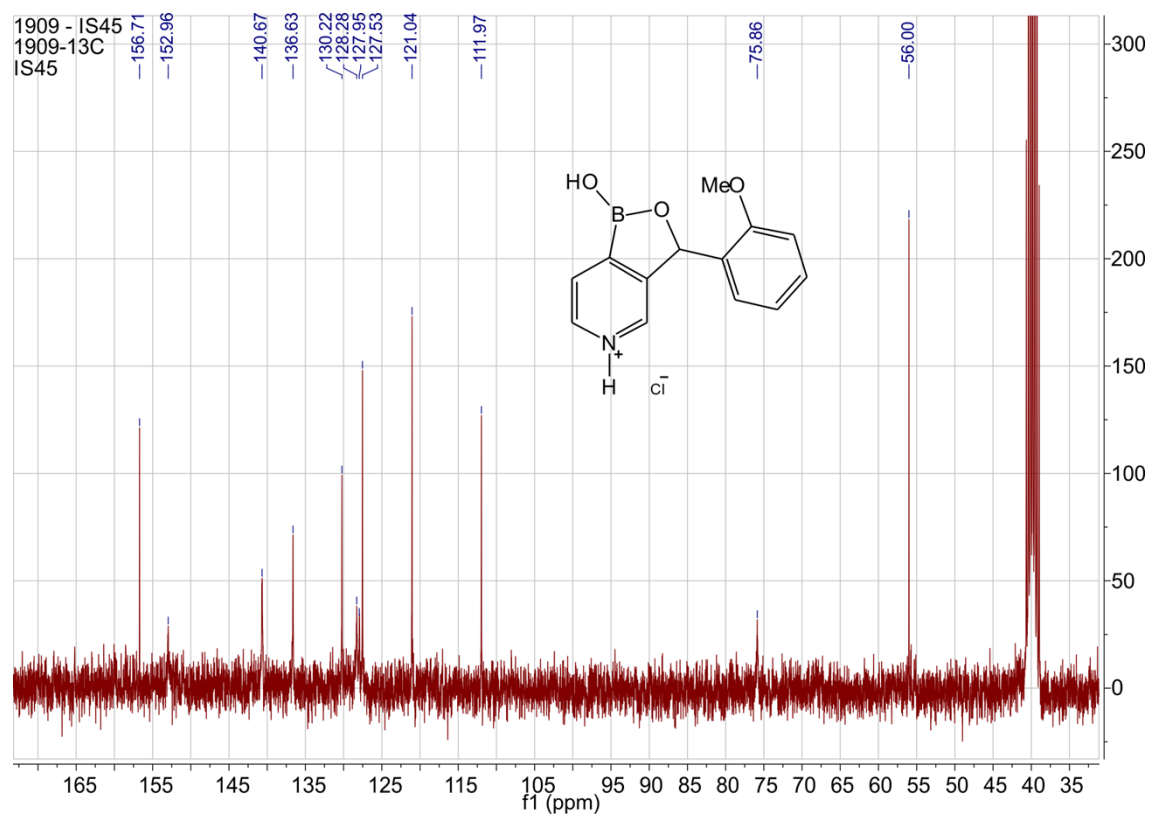

**Figure S8.**  $^{13}\text{C}$  NMR spectrum of compound **[3b-H]Cl** (75.5 MHz,  $\text{DMSO-}d_6$  solution).

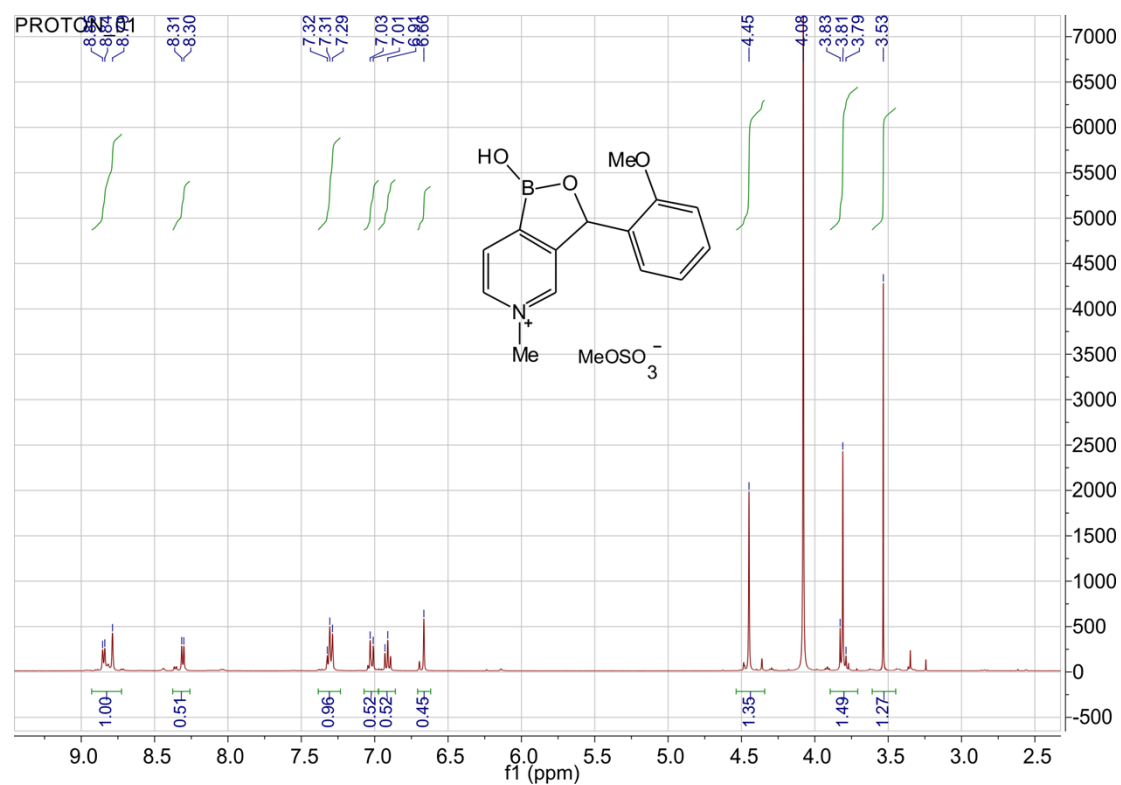

**Figure S9.** <sup>1</sup>H NMR spectrum of compound **[3b-Me]MeOSO<sub>3</sub>** (400 MHz, DMSO-*d*<sub>6</sub> solution).

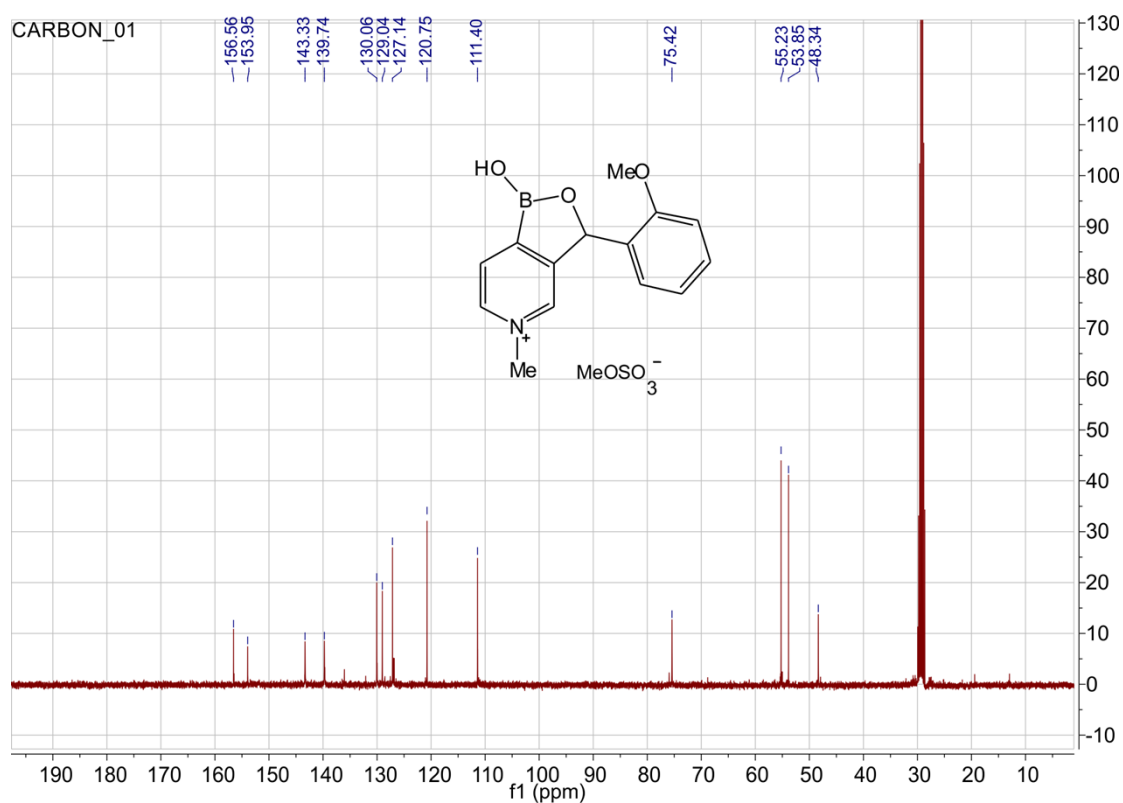

**Figure S10.** <sup>13</sup>C NMR spectrum of compound **[3b-Me]MeOSO<sub>3</sub>** (100.6 MHz, DMSO-*d*<sub>6</sub> solution).

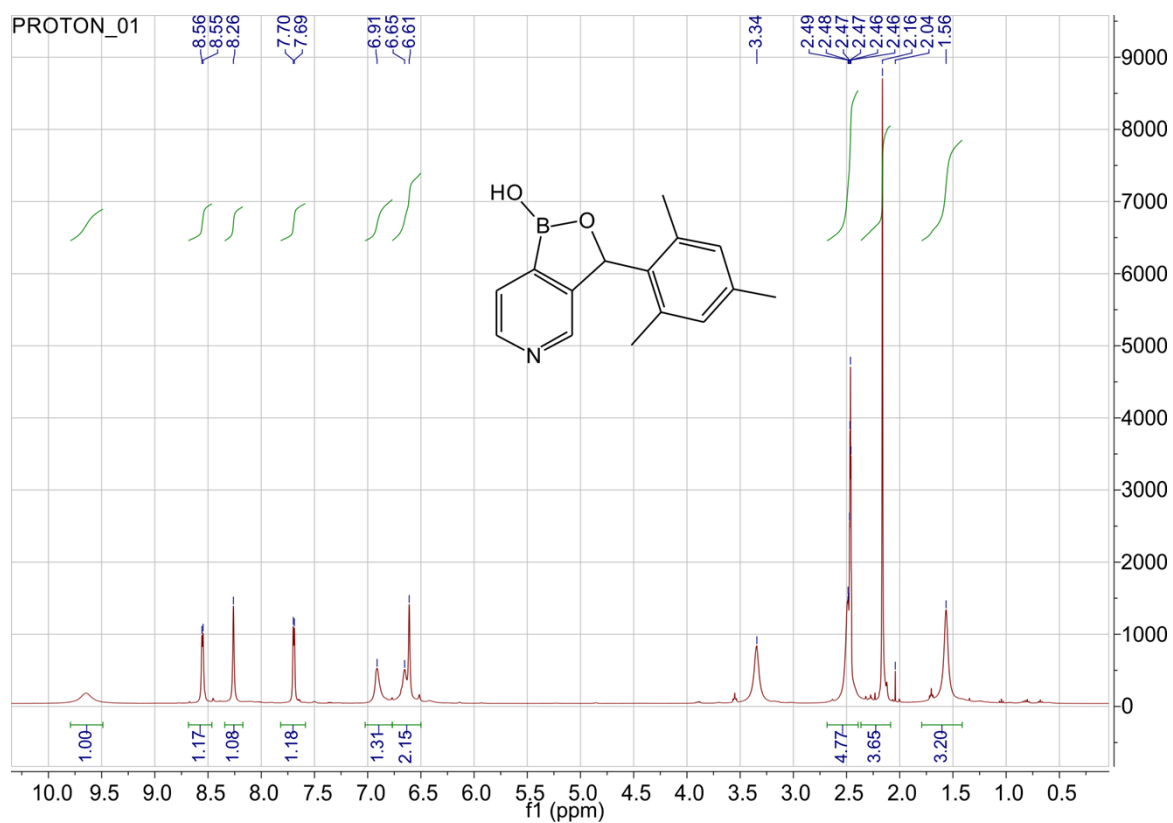

**Figure S11.**  $^1\text{H}$  NMR spectrum of compound **3c** (300 MHz,  $\text{DMSO}-d_6$  solution).

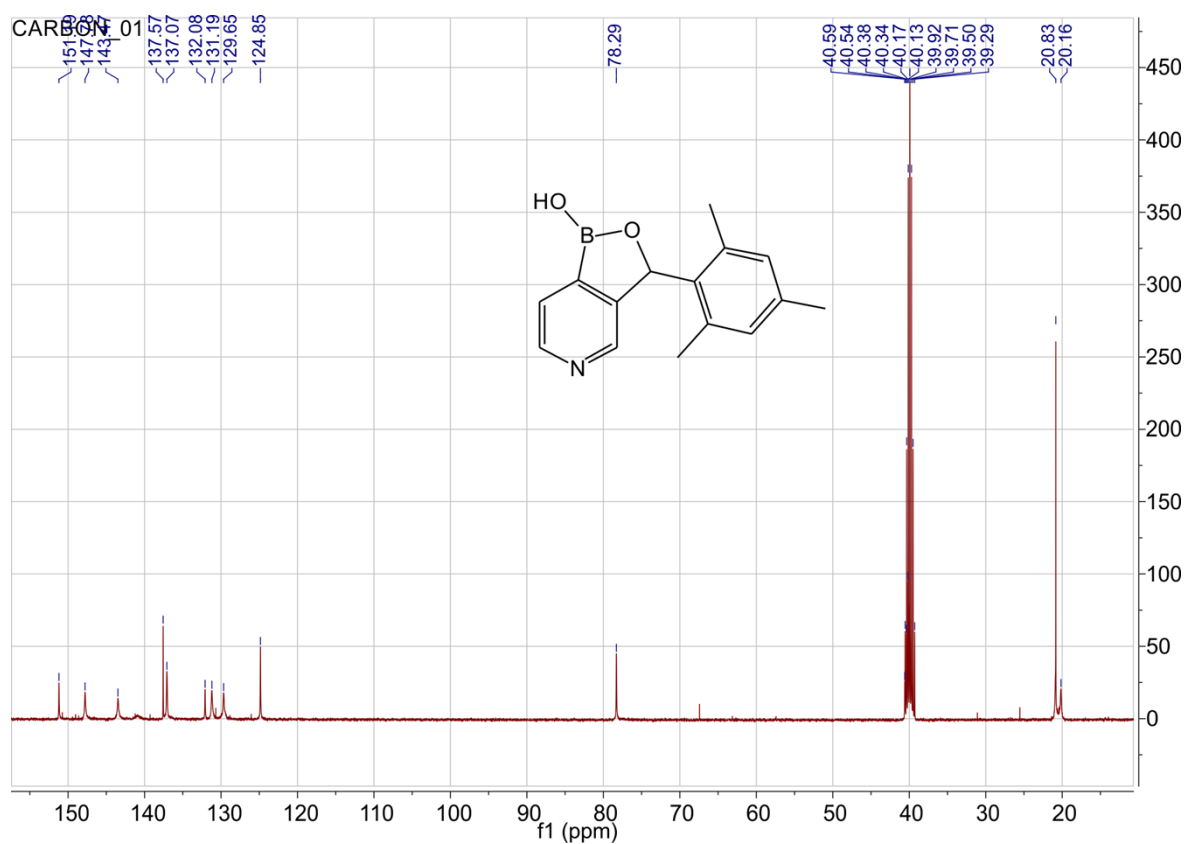

**Figure S12.**  $^{13}\text{C}$  NMR spectrum of compound **3c** (100.6 MHz,  $\text{DMSO}-d_6$  solution).

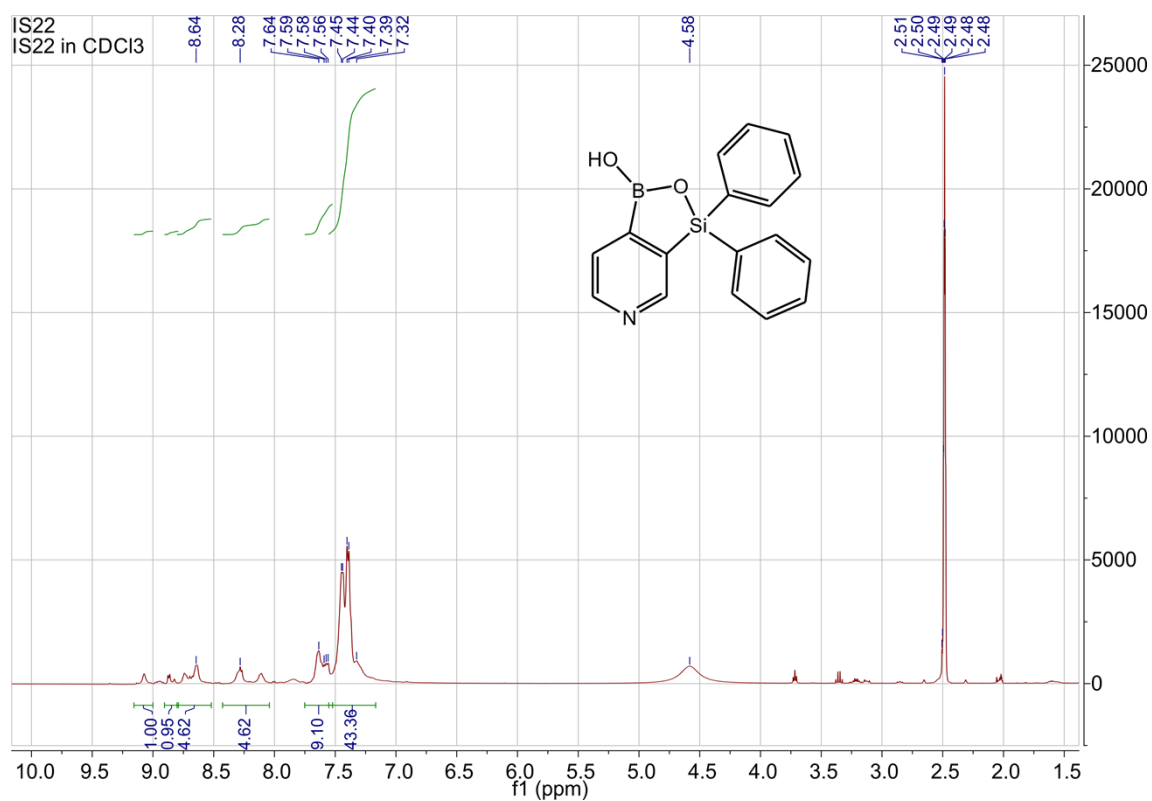

**Figure S13.**  $^1\text{H}$  NMR spectrum of compound **4** (300 MHz,  $\text{DMSO}-d_6$  solution).

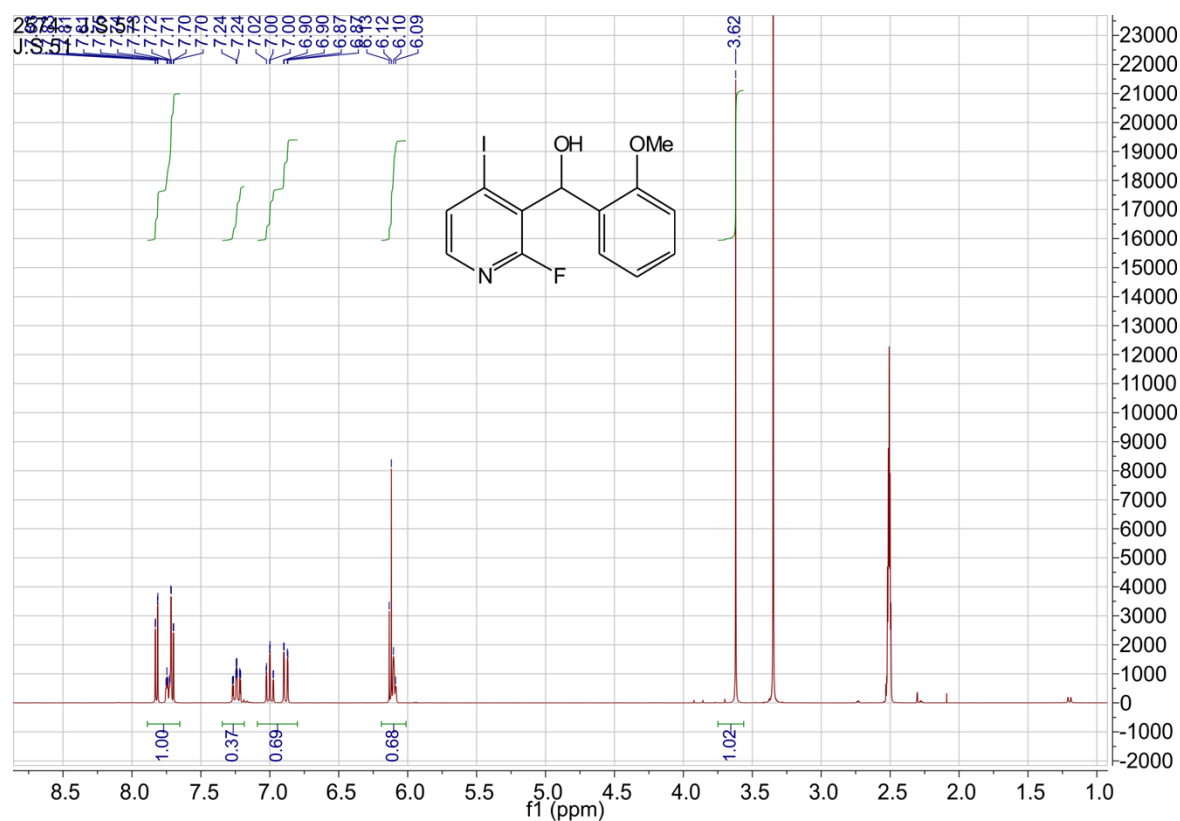

**Figure S14.**  $^1\text{H}$  NMR spectrum of compound **5a** (300 MHz,  $\text{DMSO}-d_6$  solution).



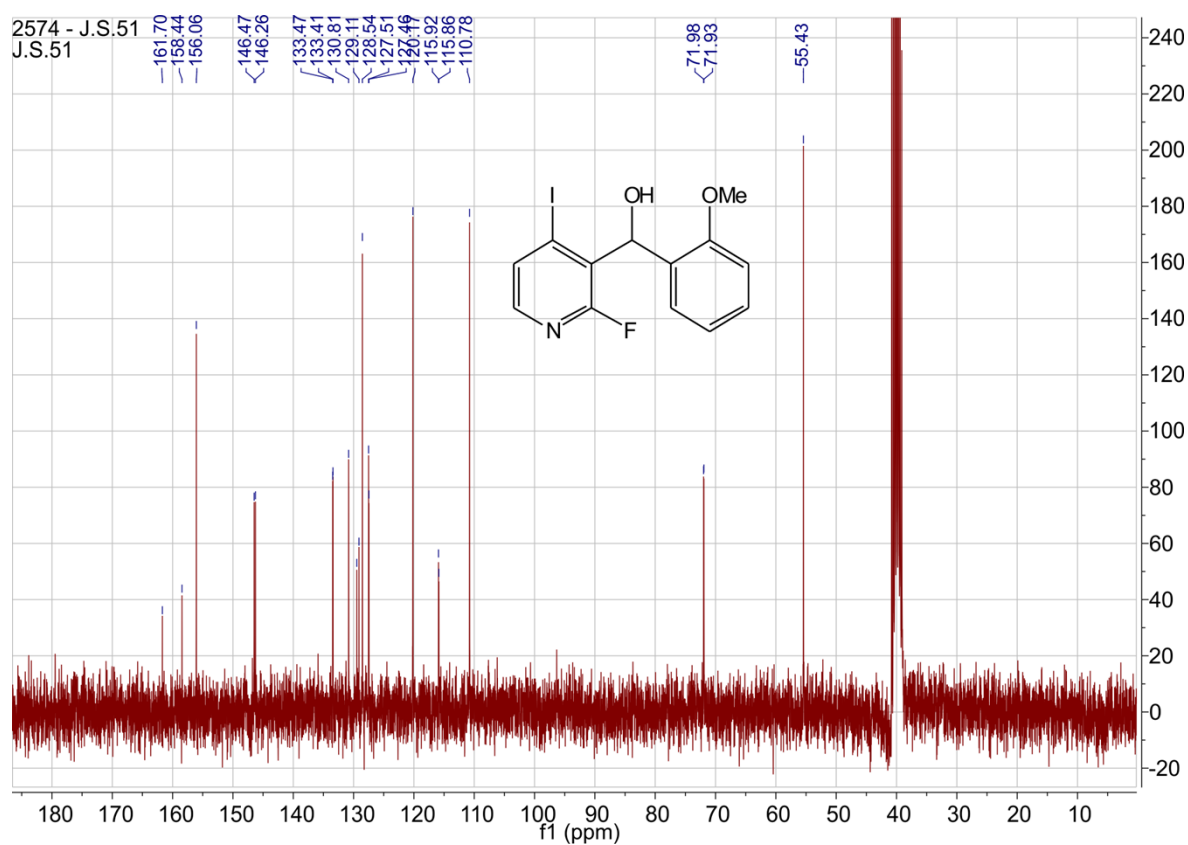

**Figure S15.** <sup>13</sup>C NMR spectrum of compound **5a** (75.5 MHz, DMSO-*d*<sub>6</sub> solution).

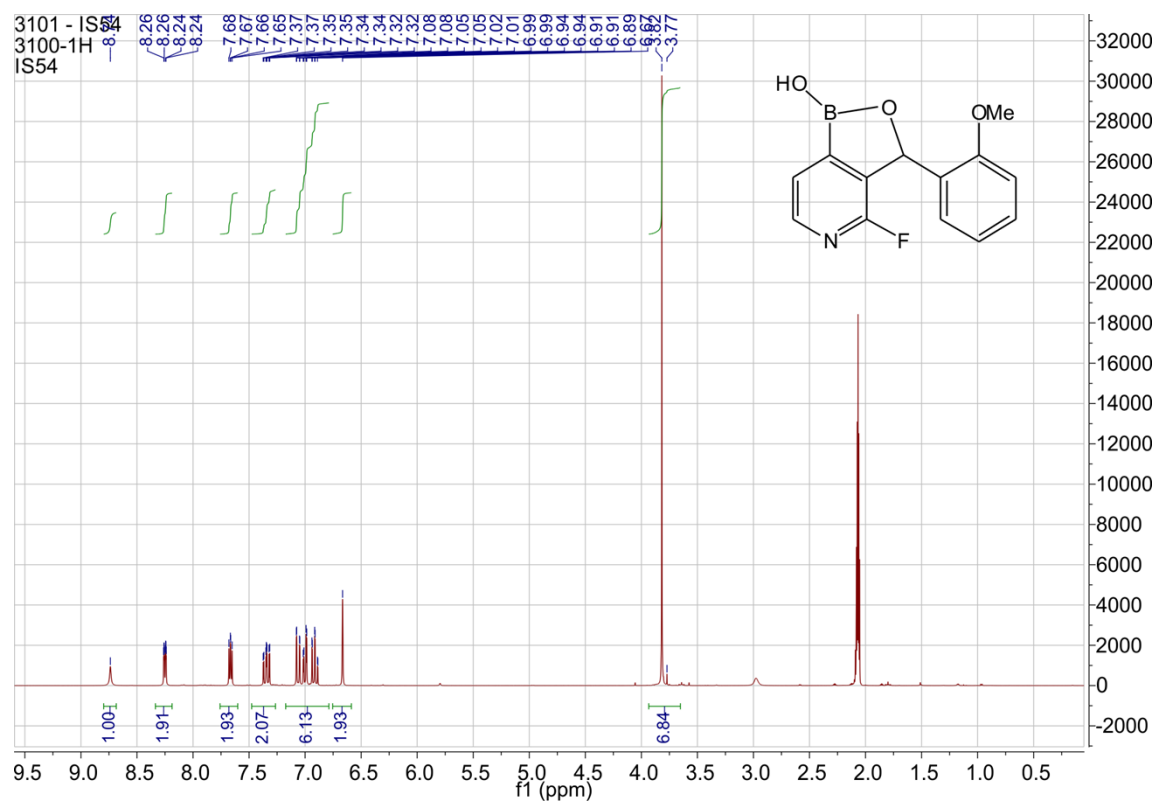

**Figure S16.** <sup>1</sup>H NMR spectrum of compound **5b** (400 MHz, acetone-*d*<sub>6</sub> solution).

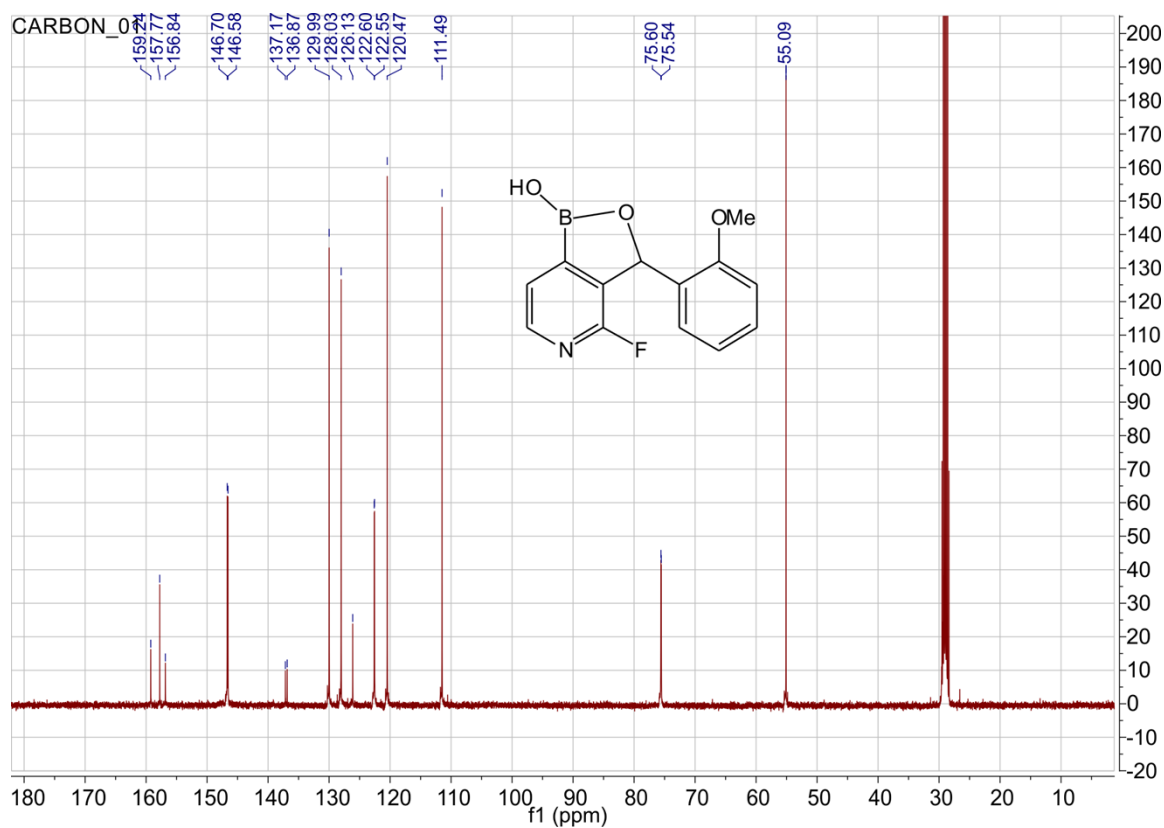

**Figure S17.**  $^{13}\text{C}$  NMR spectrum of compound **5b** (75.5 MHz, acetone- $d_6$  solution).

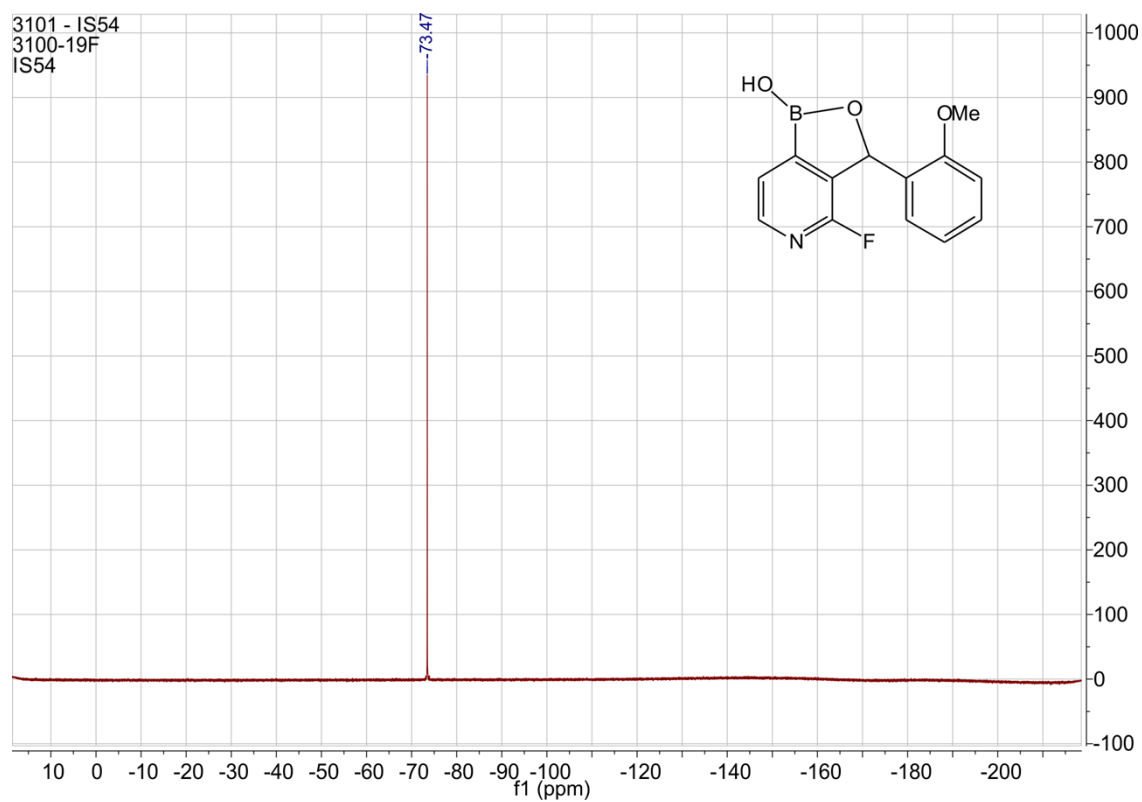

**Figure S18.**  $^{19}\text{F}$  NMR spectrum of compound **5b** (282 MHz, acetone- $d_6$  solution).

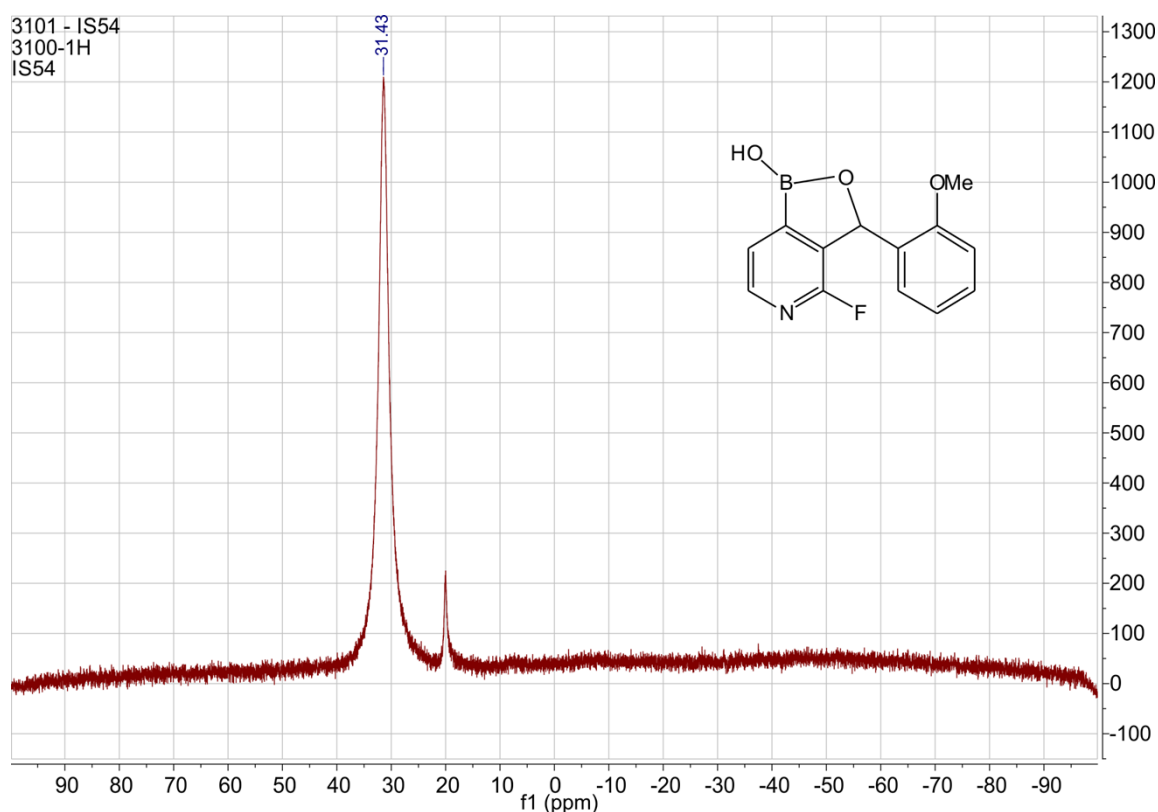

**Figure S19.**  $^{11}\text{B}$  NMR spectrum of compound **5b** (96.2 MHz, acetone- $d_6$  solution).

## 2. The $\text{p}K_{\text{a}}$ measurements

**General:** The  $\text{p}K_{\text{a}}$  values of compounds under studies (**3a-3c**, [**3b-H**]**Cl**, [**3b-Me**]**MeOSO<sub>3</sub>**, **6b**) were measured in water/methanol by the titration with 0.1 M NaOH. The  $\text{p}K_{\text{a}}$  values were estimated as equal to pH values for corresponding half-equivalence points. The titration curves of all measured compounds are typical of weak acids. Due to the use of dilute solutions in all measurements, it was generally assumed that  $K_{\text{c}} \approx K_{\text{a}}$ .

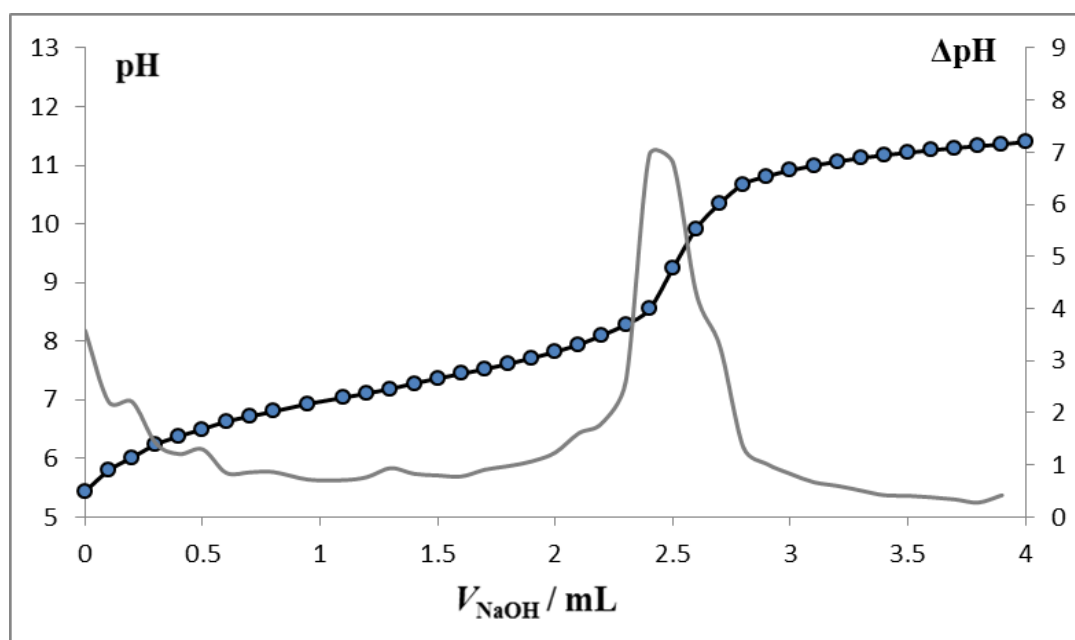

**Figure S20.** Titration curve of **3a** in water/methanol 1:1 solutions with 0.1 M NaOH.

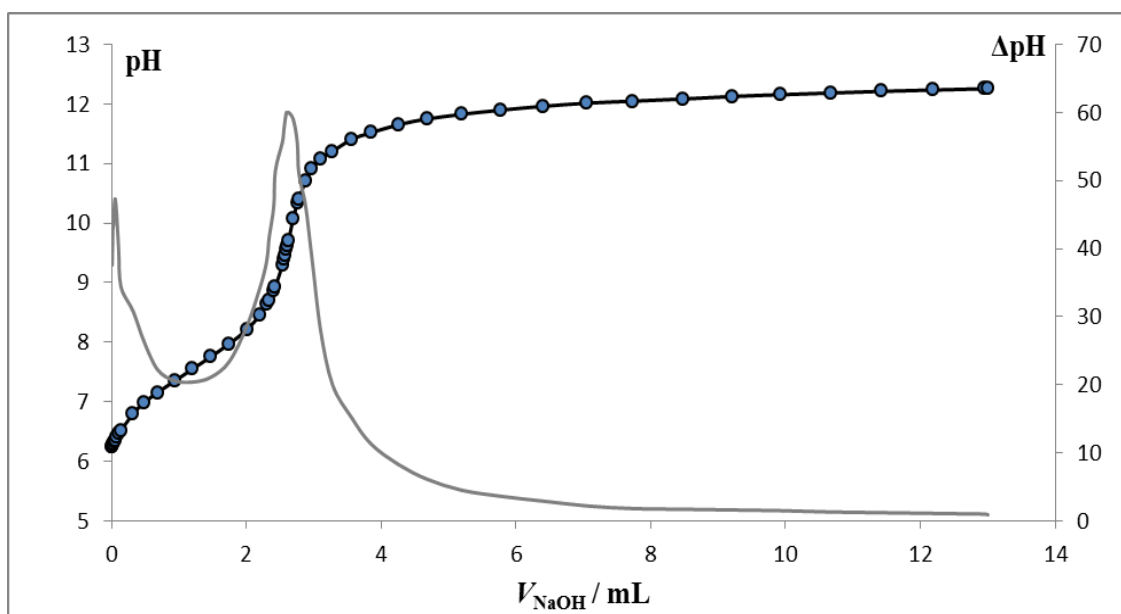

**Figure S21.** Titration curve of **3b** in water/methanol 1:1 solutions with 0.1 M NaOH.

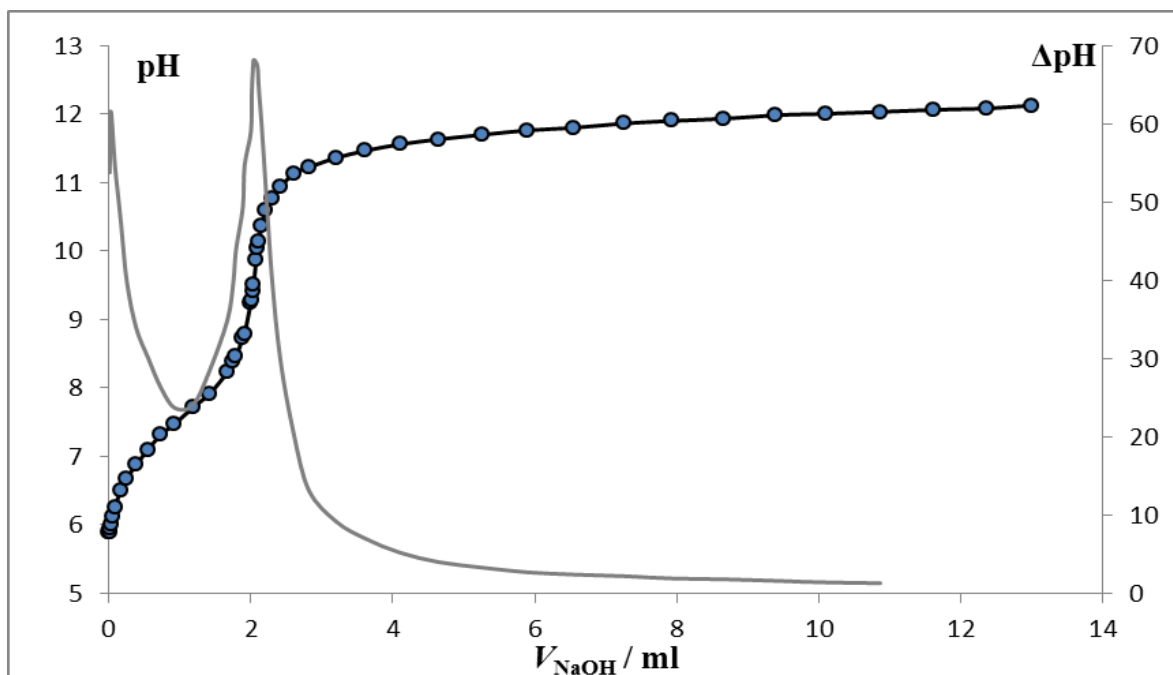

**Figure S22.** Titration curve of **3c** in water/methanol 1:1 solutions with 0.1 M NaOH.

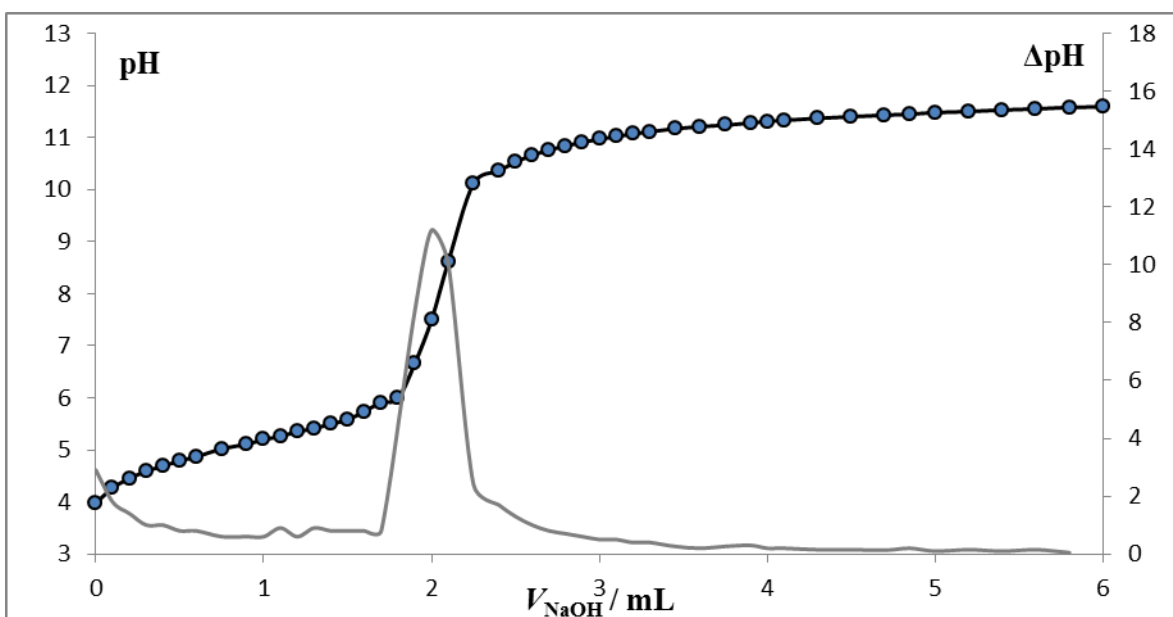

**Figure S23.** Titration curve of **6b** in water/methanol 1:1 solutions with 0.1 M NaOH.

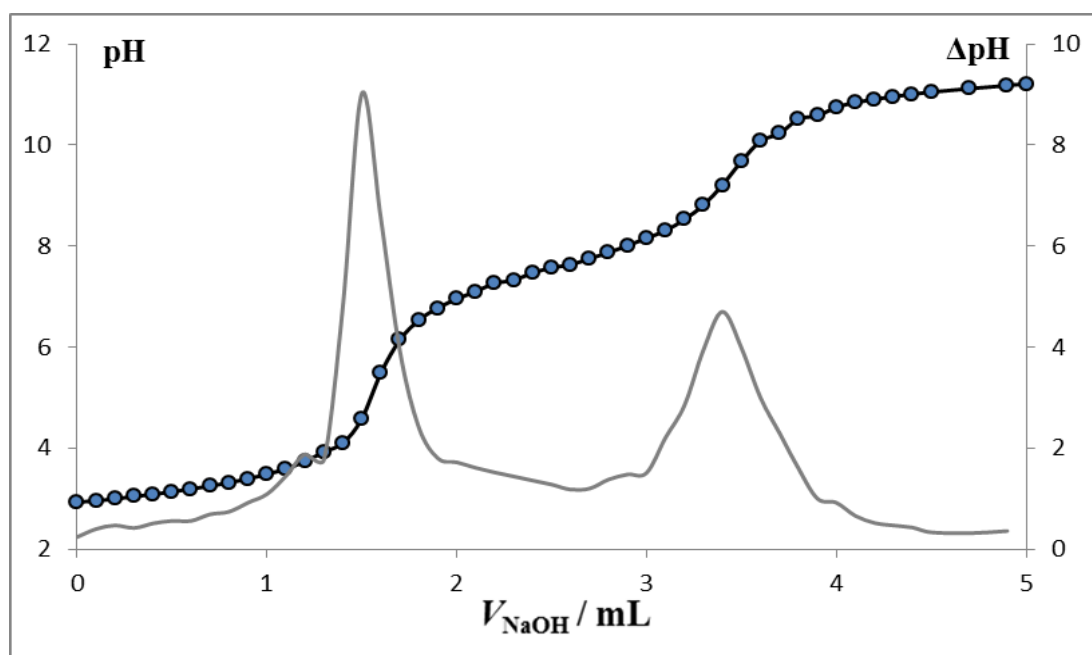

**Figure S24.** Titration curve of **[3b-H]Cl** in water/methanol 1:1 solutions with 0.1 M NaOH.

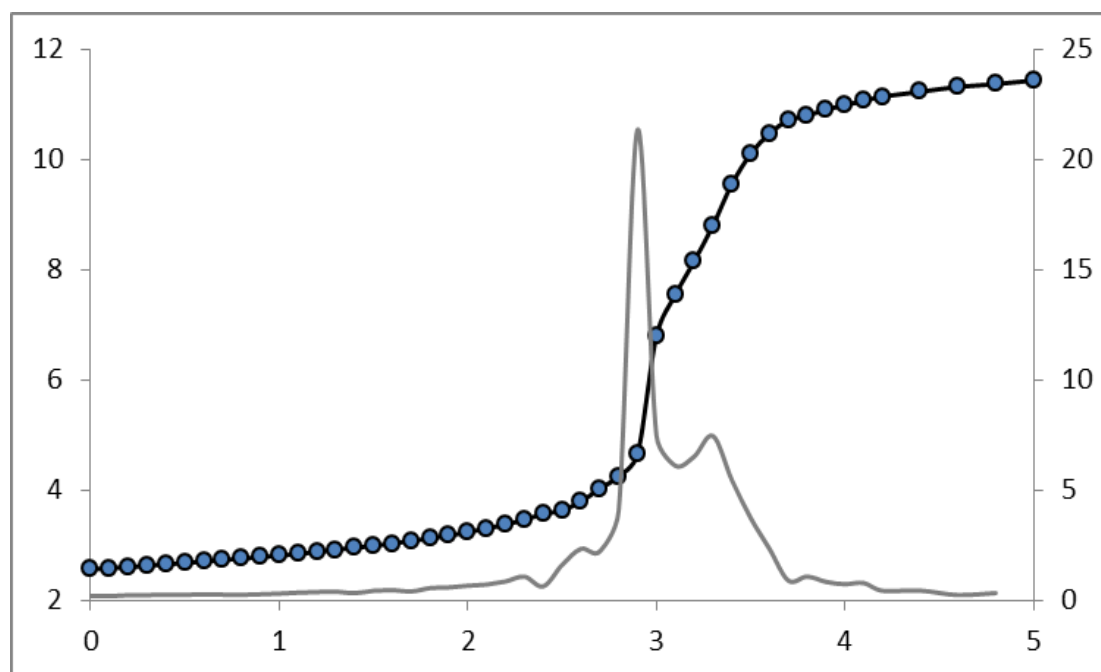

**Figure S25.** Titration curve of **[3b-Me]MeOSO<sub>3</sub>** in water/methanol 1:1 solutions with 0.1 M NaOH.

## Thermal analysis

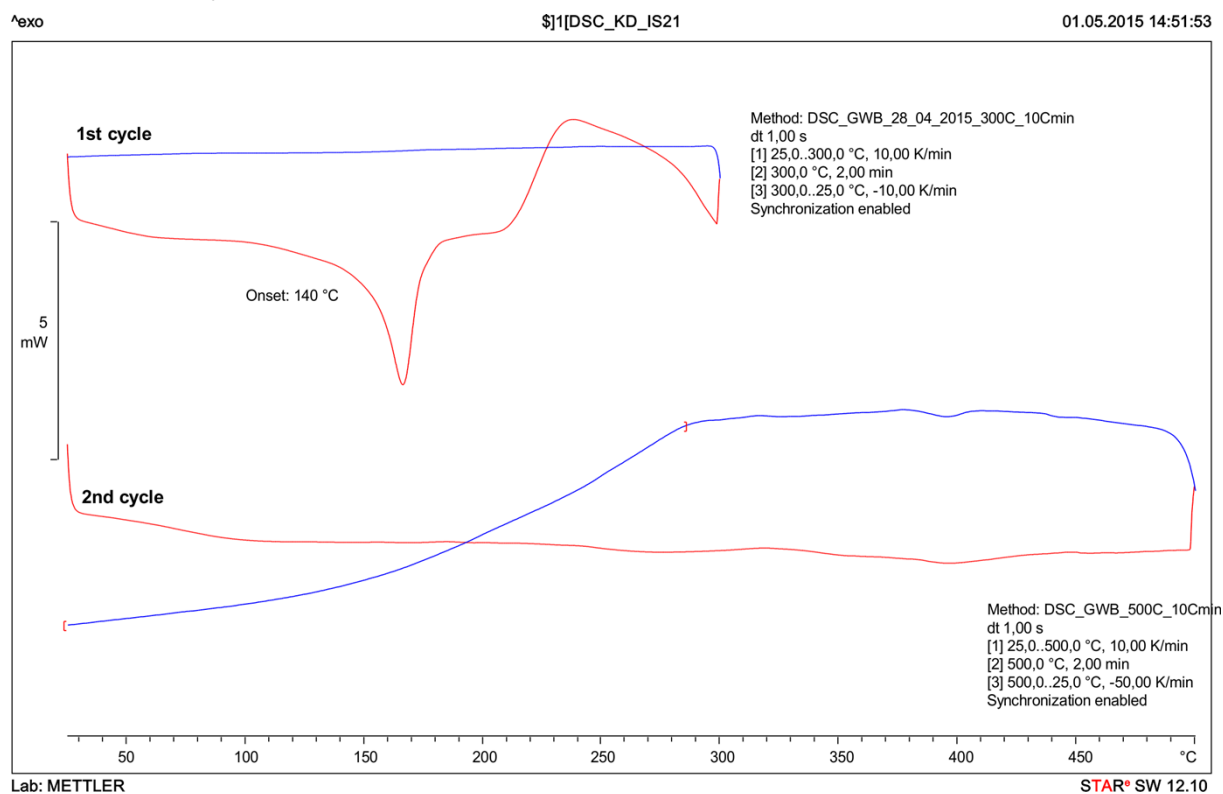

**Figure S26.** DSC curve of **3a**.

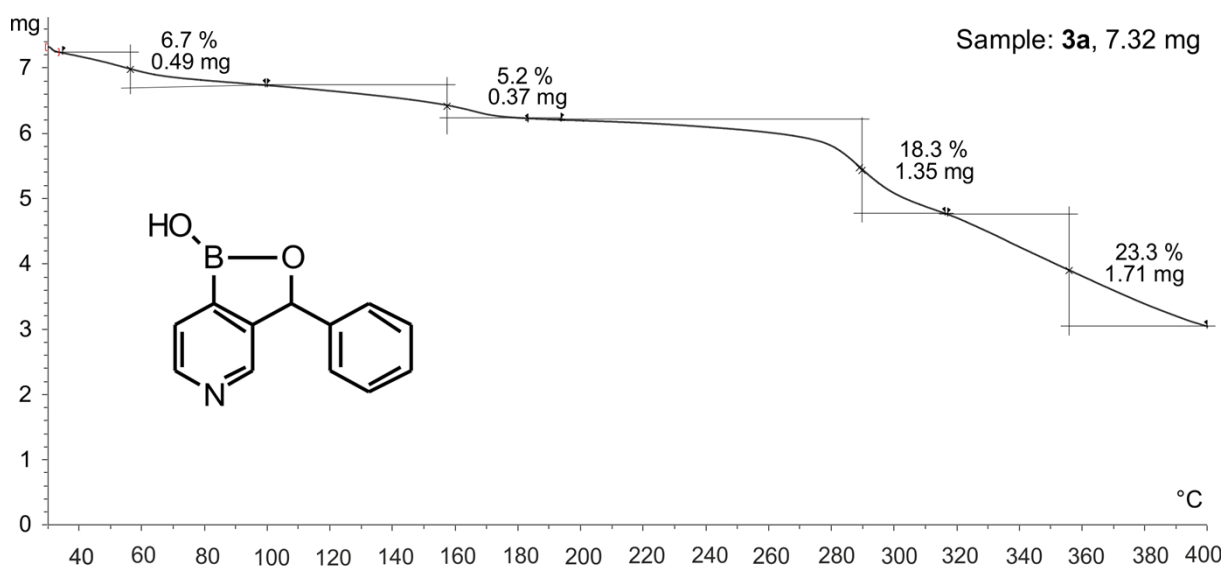

**Figure S27.** TGA curve of **3a**.

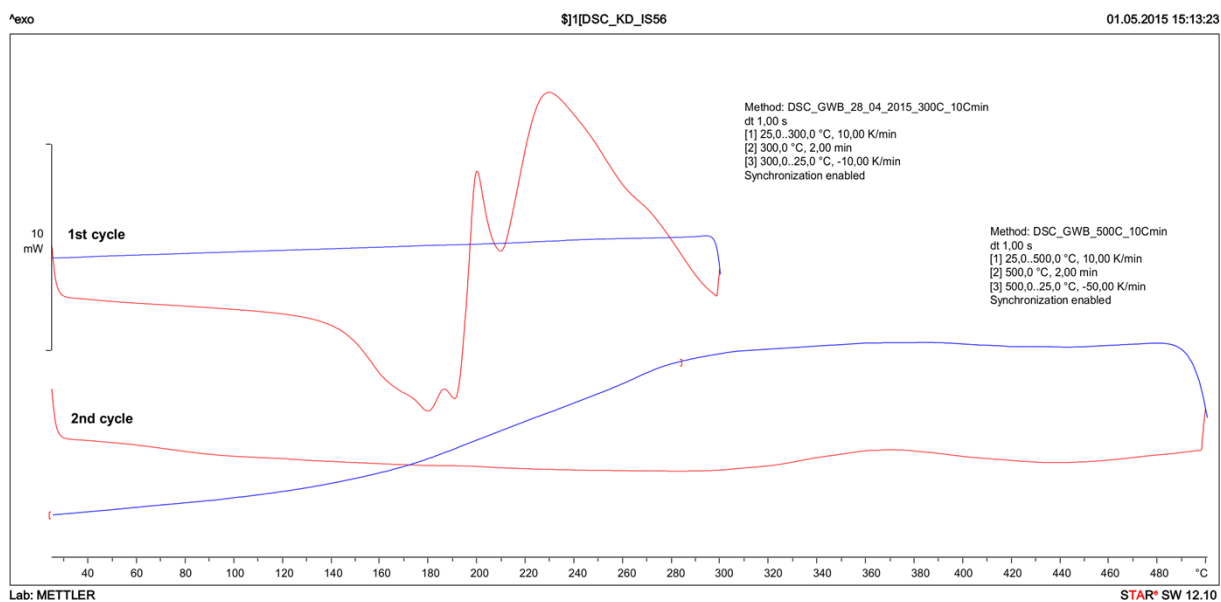

**Figure S28.** DSC curve of **3b**.

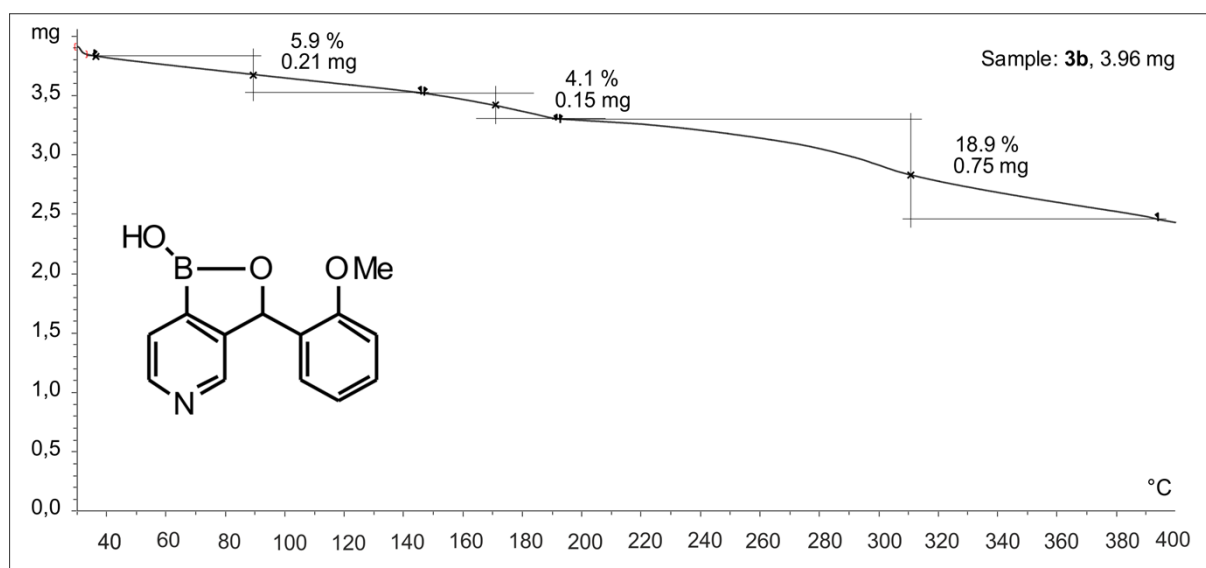

**Figure S29.** TGA curve of **3b**.



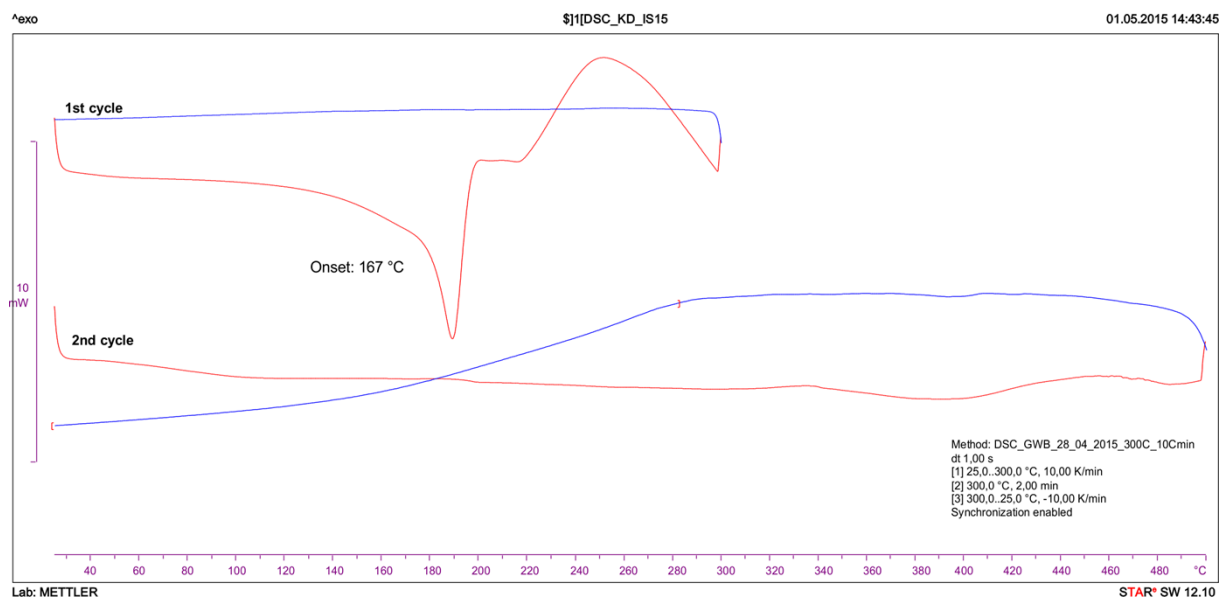

**Figure S30.** DSC curve of **3c**.

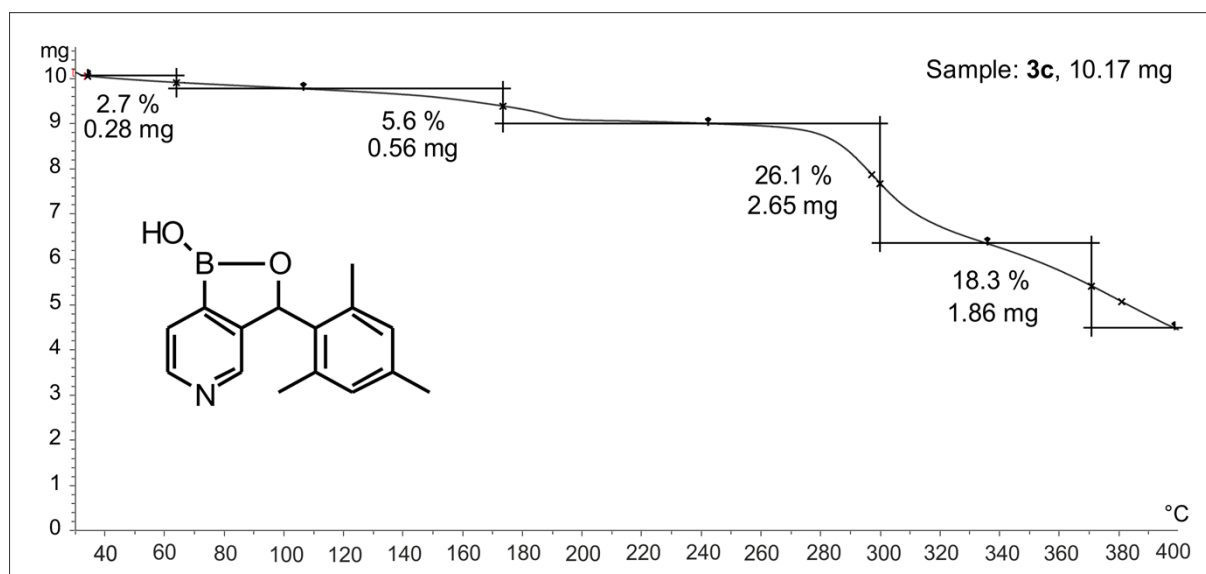

**Figure S31.** TGA curve of **3c**.

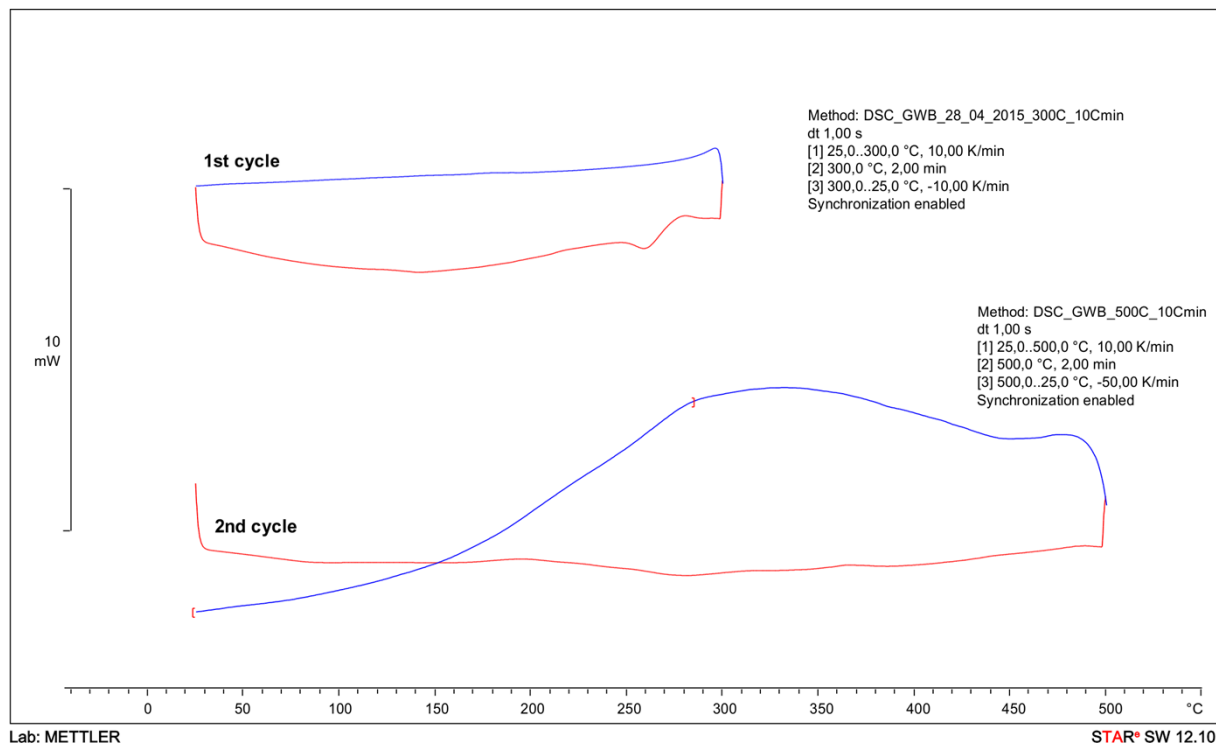

**Figure S32.** DSC curve of **4**.

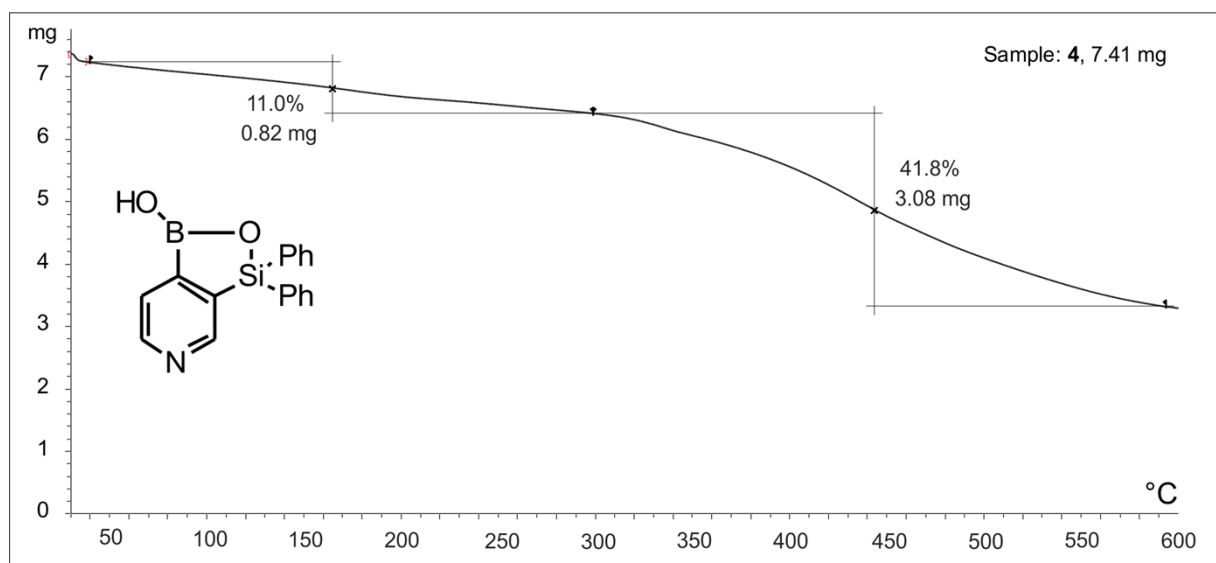

**Figure S33.** TGA curve of **4**.

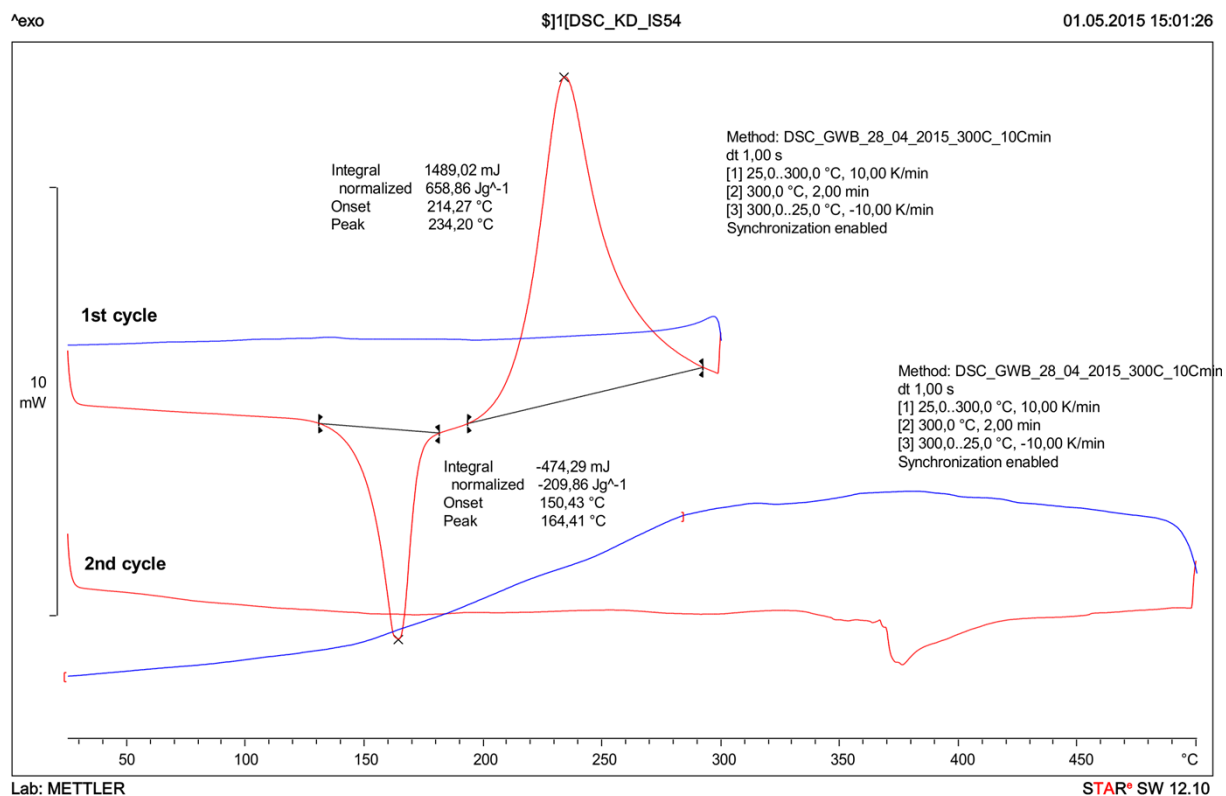

Figure S34. DSC curve of **5b**.

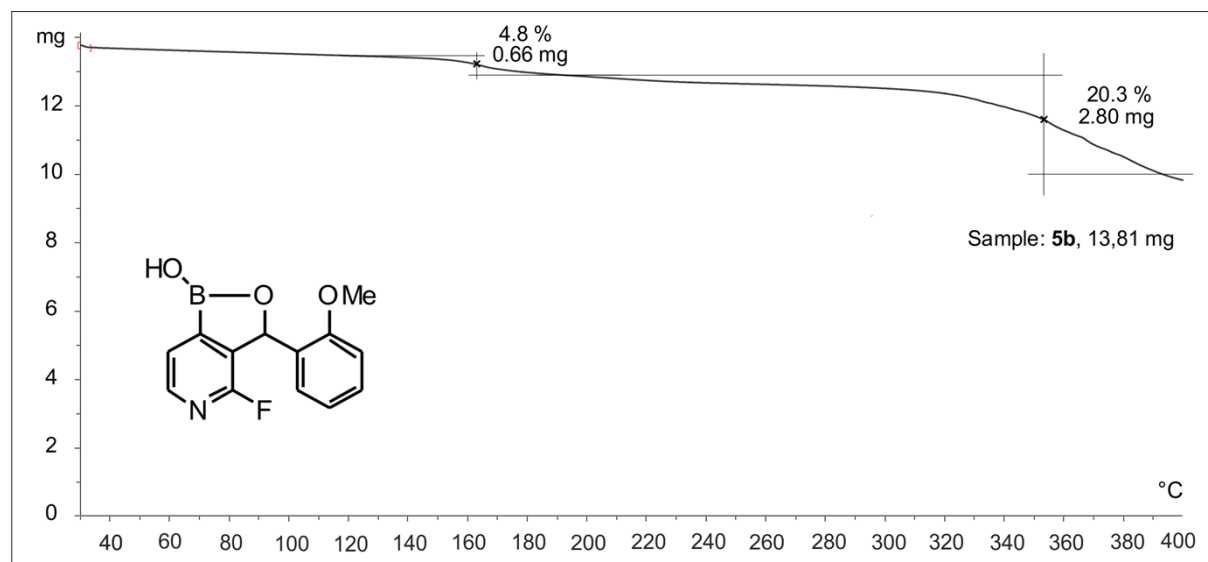

Figure S35. TGA curve of **5b**.
